# Supplementary material
Source: HighWire-hosted journal article supplement (https://openres.ersjournals.com/content/9/2/00597-2022)
Supplement: inline-supplementary-material-1 [file inline-supplementary-material-1.pdf]

**Table S1.** The chronic obstructive pulmonary disease screening questionnaire (COPD-SQ).<sup>1</sup>

| Basic Information (A)                                                                                                                                                                                           |                                                                                                                                          |                                                                                                                                                                                                                         |                                            |                                                           |                 |
|-----------------------------------------------------------------------------------------------------------------------------------------------------------------------------------------------------------------|------------------------------------------------------------------------------------------------------------------------------------------|-------------------------------------------------------------------------------------------------------------------------------------------------------------------------------------------------------------------------|--------------------------------------------|-----------------------------------------------------------|-----------------|
| A1                                                                                                                                                                                                              | Name                                                                                                                                     |                                                                                                                                                                                                                         |                                            |                                                           |                 |
| A2                                                                                                                                                                                                              | Gender                                                                                                                                   |                                                                                                                                                                                                                         | 1=Male; 2=Female. <input type="checkbox"/> |                                                           |                 |
| A3                                                                                                                                                                                                              | Identity card number                                                                                                                     |                                                                                                                                                                                                                         | □□□□□□□□□□□□□□□□ (18 digits)               |                                                           |                 |
| After filling above information, the system will prompt a message:<br>“Please wait. Your basic information is being proofread.”                                                                                 |                                                                                                                                          |                                                                                                                                                                                                                         |                                            |                                                           |                 |
| If the information is correct, the system will prompt a message:<br>“Your basic information is qualified, and a unique program identifier has been created for you. You can continue filling this form.”        |                                                                                                                                          |                                                                                                                                                                                                                         |                                            |                                                           |                 |
| If the information is incorrect, the system will prompt a message:<br>“Your basic information is incorrect. Please confirm again. Thank you!”                                                                   |                                                                                                                                          |                                                                                                                                                                                                                         |                                            |                                                           |                 |
| A4                                                                                                                                                                                                              | Address                                                                                                                                  | _____ Province/Autonomous region/Municipality/Or equivalent<br>_____ City/Or equivalent<br>_____ District/County/Or equivalent<br>_____ Road/Street/Community/Or equivalent                                             |                                            |                                                           |                 |
| A5.1                                                                                                                                                                                                            | Contact 1                                                                                                                                | □□□□□□□□□□ (11 digits)<br>(Mobile phone number of the participant)                                                                                                                                                      |                                            |                                                           |                 |
| A5.2                                                                                                                                                                                                            | Contact 2                                                                                                                                | □□□□□□□□□□ (11 digits)<br>(Mobile phone number of the first contact person)                                                                                                                                             |                                            |                                                           |                 |
| A6                                                                                                                                                                                                              | Date of filling the form                                                                                                                 | □□□□ Year □□ Month □□ Day                                                                                                                                                                                               |                                            |                                                           |                 |
| After filling above information, the system will prompt a message:<br>“Please wait. The system is saving your information.”                                                                                     |                                                                                                                                          |                                                                                                                                                                                                                         |                                            |                                                           |                 |
| After saving above information, the system will prompt another message:<br>“Please continue to fill the chronic obstructive pulmonary disease screening questionnaire (COPD-SQ), which may take three minutes.” |                                                                                                                                          |                                                                                                                                                                                                                         |                                            |                                                           |                 |
| The COPD-SQ questionnaire                                                                                                                                                                                       |                                                                                                                                          |                                                                                                                                                                                                                         |                                            |                                                           |                 |
| Risk Factor Exposure (B)                                                                                                                                                                                        |                                                                                                                                          |                                                                                                                                                                                                                         |                                            |                                                           |                 |
| B1.1                                                                                                                                                                                                            | Your smoking status                                                                                                                      | 0=Never-smoker (To answer B2); 1=Former smoker (Cessation for at least half a year); 2=Current smoker (No need to answer B1.4). <input type="checkbox"/>                                                                |                                            |                                                           |                 |
| B1.2                                                                                                                                                                                                            | How old were you when you started smoking?                                                                                               |                                                                                                                                                                                                                         |                                            | _____ Years                                               |                 |
| B1.3                                                                                                                                                                                                            | How many packs of cigarettes do you smoke per day on average? (1 pack = 20 pieces of cigarettes)                                         |                                                                                                                                                                                                                         |                                            | _____ Packs                                               |                 |
| B1.4                                                                                                                                                                                                            | How old were you when you quit smoking? (Did not smoke thereafter)                                                                       |                                                                                                                                                                                                                         |                                            | _____ Years                                               |                 |
| B2                                                                                                                                                                                                              | Do you or your family mainly use biomass fuel for cooking or warming? (e.g. corn stalk, corn cob, straw, wood, coal, animal feces, etc.) |                                                                                                                                                                                                                         |                                            | 1=Yes; 0=No. <input type="checkbox"/>                     |                 |
| Medical History and Symptoms (C)                                                                                                                                                                                |                                                                                                                                          |                                                                                                                                                                                                                         |                                            |                                                           |                 |
| C1                                                                                                                                                                                                              | Do your parents, siblings, and/or children have chronic bronchitis, pulmonary emphysema, and/or COPD?                                    |                                                                                                                                                                                                                         |                                            | 1=Yes; 0=No. <input type="checkbox"/>                     |                 |
| C2                                                                                                                                                                                                              | Do you often cough even not suffering a cold?                                                                                            |                                                                                                                                                                                                                         |                                            | 1=Yes; 0=No. <input type="checkbox"/>                     |                 |
| C3                                                                                                                                                                                                              | Do you usually have shortness of breath?                                                                                                 | 0=Usually have no shortness of breath; 1=Have shortness of breath when hurrying on the level or walking up a slight hill; 2=Have shortness of breath when walking on my own pace on the level. <input type="checkbox"/> |                                            |                                                           |                 |
| Height and Weight (D)                                                                                                                                                                                           |                                                                                                                                          |                                                                                                                                                                                                                         |                                            |                                                           |                 |
| D1                                                                                                                                                                                                              | Height                                                                                                                                   | _____ cm                                                                                                                                                                                                                |                                            | D2                                                        | Weight _____ kg |
| D3                                                                                                                                                                                                              | BMI                                                                                                                                      |                                                                                                                                                                                                                         |                                            | _____ kg/m <sup>2</sup><br>(System automatic calculation) |                 |

| E1                                                                           | Total Score of COPD-SQ                                                                                                                                                                                                                                                                                                                                                                                                                                                                                                                                                                                                                                                                                                                                                                                                                                                                                                                                                                                                                                                                                                                                                                                                                                                                                                                                                                                                                                                                                                                                                                                                                                                                                                                                                                                                                                                                                                                                                                                                                                                                                                                                                                                                                                                                                                                                                                                                                                                                                                                                                                                                                                                                                                                                                                                  | ____Points<br>(System automatic calculation) |
|------------------------------------------------------------------------------|---------------------------------------------------------------------------------------------------------------------------------------------------------------------------------------------------------------------------------------------------------------------------------------------------------------------------------------------------------------------------------------------------------------------------------------------------------------------------------------------------------------------------------------------------------------------------------------------------------------------------------------------------------------------------------------------------------------------------------------------------------------------------------------------------------------------------------------------------------------------------------------------------------------------------------------------------------------------------------------------------------------------------------------------------------------------------------------------------------------------------------------------------------------------------------------------------------------------------------------------------------------------------------------------------------------------------------------------------------------------------------------------------------------------------------------------------------------------------------------------------------------------------------------------------------------------------------------------------------------------------------------------------------------------------------------------------------------------------------------------------------------------------------------------------------------------------------------------------------------------------------------------------------------------------------------------------------------------------------------------------------------------------------------------------------------------------------------------------------------------------------------------------------------------------------------------------------------------------------------------------------------------------------------------------------------------------------------------------------------------------------------------------------------------------------------------------------------------------------------------------------------------------------------------------------------------------------------------------------------------------------------------------------------------------------------------------------------------------------------------------------------------------------------------------------|----------------------------------------------|
| <b>Total Score of COPD-SQ: _</b><br>Points<br>(System automatic calculation) | <p>The system will prompt one of the following three messages, according to the information that participants provided and total score of COPD-SQ:</p> <p><b>(1) Non-smoker, with a total score &lt; 16:</b><br/> “According to the information you provided and the COPD-SQ total score, you belong to the <b>non-COPD high-risk population</b>. Thank you for your participation and support for the national COPD screening program. You could keep following our official account through the WeChat App, to obtain prompted information on health promotion. The COPD-SQ is just a primary screening tool, but not a diagnostic test. If you want to get more professional information, you could visit a specialized hospital.”</p> <p><b>(2) Former or current smoker, with a total score &lt; 16:</b><br/> “According to the information you provided and the COPD-SQ total score, you belong to the <b>non-COPD high-risk population</b>, but you should quit smoking as soon as possible, to protect your lung function and stay healthy. Thank you for your participation and support for the national COPD screening program. You could keep following our official account through the WeChat App, to obtain prompted information on health promotion. The COPD-SQ is just a primary screening tool, but not a diagnostic test. If you want to get more professional information, you could visit a specialized hospital.”</p> <p><b>(3) Participants with a total score ≥ 16:</b><br/> “According to the information you provided and the COPD-SQ total score, you belong to the <b>COPD high-risk population</b>, therefore you should take part in the <b>on-site screening (including lung function test)</b>. Please confirm whether you have any of the following 12 contraindications* for spirometry test (Please answer “Yes” or “No” for each question).</p> <p>a) If you have any of the conditions, you may not be suitable to take a spirometry test currently. The medical staff will contact you three months later for the on-site screening.</p> <p>b) If you have none of the conditions, the medical staff will contact you within three months to make an appointment for the on-site screening. Due to the actual situation, your appointment may be altered. The medical staff will contact you at least three days in advance to confirm the on-site screening date, time, and place, so please keep your phone available. Since this is a non-profit program funded by the government, all sections of the on-site screening are free.</p> <p>Thank you for your participation and support for the national COPD screening program. You could keep following our official account through the WeChat App, to obtain prompted information on health promotion.”</p> |                                              |

**\*The 12 contraindications for spirometry test:**

- (1) Experienced myocardial infarction, stroke, or shock in the past three months;
- (2) Experienced severe cardiac insufficiency, severe arrhythmia, or unstable angina pectoris in the past four weeks;
- (3) Experienced massive hemoptysis in the past four weeks;
- (4) Received chest, abdominal, or ophthalmic surgery in the past three months;
- (5) Having mental disorders (e.g. auditory hallucinations, visual hallucinations, seizures requiring medication, or taking antipsychotics, etc.);
- (6) Having cognitive impairment (e.g. dementia, or comprehension impairment, etc.);
- (7) Having uncontrolled hypertension (i.e. systolic blood pressure > 200 mmHg, and/or diastolic blood pressure > 100 mmHg);
- (8) Presenting with heart rate >120 beats/min;
- (9) Having aortic aneurysm;
- (10) Having severe hyperthyroidism;
- (11) Are pregnant or lactating women;
- (12) Experienced respiratory infection (e.g. tuberculosis, or influenza, etc.) in the past month.

**Abbreviations:**

BMI: body mass index; COPD: chronic obstructive pulmonary disease; COPD-SQ: chronic obstructive pulmonary disease screening questionnaire.

**References:**

1. Zhou YM, Chen SY, Tian J, et al. Development and validation of a chronic obstructive pulmonary disease screening questionnaire in China. *Int J Tuberc Lung Dis* 2013; **17**(12): 1645-51.
