# Supplementary material
Source: HighWire-hosted journal article supplement (https://openres.ersjournals.com/content/9/2/00597-2022)
Supplement: inline-supplementary-material-3 [file inline-supplementary-material-3.pdf]

**Table S3.** The baseline survey and follow-up plans for respective target populations.

| Target population            | Baseline survey                                                                                                                                                                                                                                                       | Follow-ups                                                              |                                                                                                           |                                                                                                                                                                       |                                                                                                                                                                       |
|------------------------------|-----------------------------------------------------------------------------------------------------------------------------------------------------------------------------------------------------------------------------------------------------------------------|-------------------------------------------------------------------------|-----------------------------------------------------------------------------------------------------------|-----------------------------------------------------------------------------------------------------------------------------------------------------------------------|-----------------------------------------------------------------------------------------------------------------------------------------------------------------------|
|                              |                                                                                                                                                                                                                                                                       | Month 1                                                                 | Month 3                                                                                                   | Month 6                                                                                                                                                               | Month 12                                                                                                                                                              |
| COPD high-risk population I  | <ul style="list-style-type: none"> <li>• COPD-SQ questionnaire</li> <li>• Informed consent</li> <li>• Baseline questionnaire</li> <li>• Anthropometry measurement</li> <li>• Pre-bronchodilator spirometry test</li> <li>• In-time intervention</li> </ul>            | /                                                                       | /                                                                                                         | <ul style="list-style-type: none"> <li>• Telephone follow-up</li> <li>• Secondary intervention</li> </ul>                                                             | <ul style="list-style-type: none"> <li>• Face-to-face follow-up</li> <li>• Pre- and post-bronchodilator spirometry tests</li> <li>• Secondary intervention</li> </ul> |
| COPD high-risk population II | <ul style="list-style-type: none"> <li>• COPD-SQ questionnaire</li> <li>• Informed consent</li> <li>• Baseline questionnaire</li> <li>• Anthropometry measurement</li> <li>• Pre- and post-bronchodilator spirometry tests</li> <li>• In-time intervention</li> </ul> | /                                                                       | /                                                                                                         | <ul style="list-style-type: none"> <li>• Face-to-face follow-up</li> <li>• Pre- and post-bronchodilator spirometry tests</li> <li>• Secondary intervention</li> </ul> | <ul style="list-style-type: none"> <li>• Face-to-face follow-up</li> <li>• Pre- and post-bronchodilator spirometry tests</li> <li>• Secondary intervention</li> </ul> |
| Confirmed COPD patients      | <ul style="list-style-type: none"> <li>• COPD-SQ questionnaire</li> <li>• Informed consent</li> <li>• Baseline questionnaire</li> <li>• Anthropometry measurement</li> <li>• Pre- and post-bronchodilator spirometry tests</li> <li>• In-time intervention</li> </ul> | <ul style="list-style-type: none"> <li>• Telephone follow-up</li> </ul> | <ul style="list-style-type: none"> <li>• Telephone follow-up</li> <li>• Secondary intervention</li> </ul> | /                                                                                                                                                                     | <ul style="list-style-type: none"> <li>• Face-to-face follow-up</li> <li>• Pre- and post-bronchodilator spirometry tests</li> <li>• Secondary intervention</li> </ul> |

The COPD-SQ questionnaire can be found in Table S1. The baseline questionnaire, anthropometry measurement, telephone and face-to-face follow-up investigation contents for respective target populations can be found in Table S4. The in-time and secondary intervention measures for respective target populations can be found in Table S5. The grace period for follow-ups is set within one week.

**Abbreviations:**

COPD: chronic obstructive pulmonary disease; COPD-SQ: chronic obstructive pulmonary disease screening questionnaire.
