# Supplementary material
Source: HighWire-hosted journal article supplement (https://openres.ersjournals.com/content/9/2/00597-2022)
Supplement: inline-supplementary-material-5 [file inline-supplementary-material-5.pdf]

**Table S5.** The intervention measures for respective target populations.

| Target population            | Interventions                                                                                                                                                                                                                                                                                                                                                                                                                                                                                                                                                                                                                                                                                                                                                                                                                                                                                       |
|------------------------------|-----------------------------------------------------------------------------------------------------------------------------------------------------------------------------------------------------------------------------------------------------------------------------------------------------------------------------------------------------------------------------------------------------------------------------------------------------------------------------------------------------------------------------------------------------------------------------------------------------------------------------------------------------------------------------------------------------------------------------------------------------------------------------------------------------------------------------------------------------------------------------------------------------|
| COPD high-risk population I  | <p>(1) Brief introduction of COPD, including definition, risk factors, commonly seen symptoms, and development of the disease, etc.;</p> <p>(2) Avoiding exposure to high risk factors, e.g. smoking/second-hand smoking, air pollution, cooking fuels, and respiratory infection, etc.;</p> <p>(3) Monitoring of respiratory symptoms, e.g. cough, sputum, and dyspnea, etc.;</p> <p>(4) Taking a pulmonary function test each year;</p> <p>(5) Taking a physical examination each year;</p> <p>(6) Suggesting a balanced diet;</p> <p>(7) Taking moderate physical exercise insistently;</p> <p>(8) Keeping mentally healthy;</p> <p>(9) Getting vaccinated against influenza and streptococcus pneumoniae, etc.</p>                                                                                                                                                                              |
| COPD high-risk population II | <p>(1) Brief introduction of COPD, including definition, risk factors, commonly seen symptoms, and development of the disease, etc.;</p> <p>(2) Avoiding exposure to high risk factors, e.g. smoking/second-hand smoking, air pollution, cooking fuels, and respiratory infection, etc.;</p> <p>(3) Avoiding exposure to allergic factors, e.g. flowers, pets, cold air, and dust, etc.;</p> <p>(4) Monitoring of respiratory symptoms, e.g. cough, sputum, wheeze, and dyspnea, etc.;</p> <p>(5) Taking a pulmonary function test each year;</p> <p>(6) Taking a physical examination each year;</p> <p>(7) Suggesting a balanced diet;</p> <p>(8) Taking moderate physical exercise insistently;</p> <p>(9) Keeping mentally healthy;</p> <p>(10) Getting vaccinated against influenza and streptococcus pneumoniae, etc.</p>                                                                     |
| Confirmed COPD patients      | <p>(1) Brief introduction of COPD, including definition, risk factors, commonly seen symptoms, and development of the disease, etc.;</p> <p>(2) Avoiding exposure to high risk factors, e.g. smoking/second-hand smoking, air pollution, cooking fuels, and respiratory infection, etc.;</p> <p>(3) Monitoring of respiratory symptoms, e.g. cough, sputum, and dyspnea, etc.;</p> <p>(4) Taking pharmaceutical medicine according to the doctor's advice with good compliance;</p> <p>(5) Taking a pulmonary function test each year;</p> <p>(6) Taking a physical examination (especially for the comorbidities) each year;</p> <p>(7) Suggesting a balanced diet and taking nutrition supplements if needed;</p> <p>(8) Taking suitable respiratory rehabilitation;</p> <p>(9) Keeping mentally healthy;</p> <p>(10) Getting vaccinated against influenza and streptococcus pneumoniae, etc.</p> |

The in-time and secondary intervention measures are basically the same for a specific population.

**Abbreviations:**

COPD: chronic obstructive pulmonary disease.
