# Supplementary material
Source: HighWire-hosted journal article supplement (https://openres.ersjournals.com/content/9/2/00597-2022)
Supplement: inline-supplementary-material-6 [file inline-supplementary-material-6.pdf]

**Table S6.** The spirometry quality grading criteria for FEV1 and FVC.

| Grade | Number of measurements                          | Repeatability            |
|-------|-------------------------------------------------|--------------------------|
| A     | 3 acceptable tests; of which, 2 repeatable      | Variation within 0.150 L |
| B     | 3 acceptable tests; of which, 2 repeatable      | Variation within 0.200 L |
| C     | At least 2 acceptable tests                     | Variation within 0.250 L |
| D     | At least 2 acceptable tests, but not repeatable | NA                       |
| F     | No acceptable tests                             | NA                       |

The A, B, C, D, and F grading criteria are used for quality assessment for FEV1 (flow) and FVC (volume), which are consistent with the ATS/ERS<sup>1</sup> and Chinese<sup>2</sup> guidelines on spirometry. The grading criteria applies to both pre- and post-bronchodilator spirometry tests. For each participant, three acceptable and repeatable tests are preferred; the maximum number of tests is eight.

**Abbreviations:**

FEV1: forced expiratory volume in one second; FVC: forced vital capacity; NA: not applicable.

**References:**

1. Miller MR, Hankinson J, Brusasco V, et al. Standardisation of spirometry. *Eur Respir J* 2005; **26**(2): 319-38.
2. Chinese Thoracic Society, Lung Function Group. Guidelines on Lung Function Test (Part II): the Spirometry. (in Chinese). *Chinese Journal of Tuberculosis and Respiratory Diseases* 2014; **37**(7): 481-6.
